# Supplementary material for: The cooperative application of oyster shell and biochar efficiently enhanced in-situ remediation of cadmium contaminated soil around intensive industry
Source: Copernicus journal article supplement (doi:10.5194/soil-2021-145), 2022-01-24
Supplement: Supplementary file 1 [file NY2020-086PE.xlsx]

## Sheet: soil biochemical properties
Treatments	Num	Type	No	pH	average	ALN mg/kg	average	OSK mg/kg	average	OM g/kg	average	OC %	average	CEC cmol/kg	average	OSP mg/kg	average
R-PA0	1	soil	NY20086-159	5.6		166.583		114.13		40.5223		2.35048		15.6615		13.1649
	2	soil	NY20086-160	5.3		147.07		135		34.6349		2.00899		13.987		12.4
	3	soil	NY20086-161	5.4		161.412		135		41.2402		2.39213		15.563		11.5576
	4	soil	NY20086-162	5.7		158		152.203		42.188		2.4471		15.3168		13.6
	5	soil	NY20086-163	5.7	5.54	156.999	158.013	139.008	135.068	38.0812	39.3333	2.20888	2.28151	14.0363	14.9129	11.4045	12.4254
R-PA1	6	soil	NY20086-164	5.3		174.099		161.016		42.5757		2.46959		15.0705		10.7922
	7	soil	NY20086-165	5.7		165		185.494		41.3551		2.39879		14.6863		11.4811
	8	soil	NY20086-166	5.5		159.964		136.2		40.0915		2.32549		14.4056		11.6
	9	soil	NY20086-167	5.8		168.583		176.743		42.9887		2.49354		15.4153		13.9303
	10	soil	NY20086-168	5.6	5.58	157.827	165.094	167.706	165.432	39.3735	41.2769	2.28385	2.39425	14.8242	14.8804	10.333	11.6273
R-PA2	11	soil	NY20086-169	7.3		164.308		159.864		39.5171		2.29218		15.366		29.8403
	12	soil	NY20086-170	7.3		157.482		165		38.5119		2.23387		16.154		29.5672
	13	soil	NY20086-171	7.6		166.721		166.465		41.9008		2.43044		14.3909		47.5218
	14	soil	NY20086-172	7.9		170.789		196.441		42.6475		2.47375		14.4795		65.5
	15	soil	NY20086-173	6.5	7.32	176.374	167.135	144.634	166.481	44.2557	41.3666	2.56704	2.39945	16.0555	15.2892	14.8488	37.4556
R-PA3	16	soil	NY20086-174	7.7		176		186		44.2557		2.56704		16.9026		43.0844
	17	soil	NY20086-175	7.7		145.416		166		38.0812		2.20888		13.1497		46.7026
	18	soil	NY20086-176	6.3		179.132		184.268		45.7435		2.65333		15.1985		17.9104
	19	soil	NY20086-177	7.1		183.338		167.727		46.6055		2.70333		16.548		39.8075
	20	soil	NY20086-178	6.7	7.1	151.897	167.157	176.078	176.015	41.3838	43.2139	2.40045	2.50661	15.2675	15.4133	31.3422	35.7694
RT-PA0	21	soil	NY20086-179	5.3		164.583		154.791		42.8606		2.48611		14.4992		9.3
	22	soil	NY20086-180	5.5		143.07		154		44.3068		2.57		14.9326		9.87371
	23	soil	NY20086-181	5.1		164.412		173.34		44.1631		2.56167		14.6765		9.26139
	24	soil	NY20086-182	5.2		155		154		43.4		2.66699		16.3805		9.3
	25	soil	NY20086-183	5	5.22	153.999	156.213	133.561	153.938	42.389	43.4239	2.45876	2.5487	15.6122	15.2202	8.80214	9.30745
RT-PA1	26	soil	NY20086-184	5.4		145.14		145.221		45		2.61		14.7257		8.11328
	27	soil	NY20086-185	5.2		165.48		145.02		42.9634		2.49207		15.957		8.57252
	28	soil	NY20086-186	5.2		151.897		153.143		45		2.61		15.169		9.03176
	29	soil	NY20086-187	5.4		170.927		173.738		42.59		2.47042		15.6615		9.56755
	30	soil	NY20086-188	5.2	5.28	184.924	163.674	216	166.624	49.4521	45.0011	2.86845	2.61019	16.8435	15.6714	10.1799	9.093
RT-PA2	31	soil	NY20086-189	6.4		161.964		175.722		39.9479		2.31716		15.4645		36.9
	32	soil	NY20086-190	7.1		168.031		149.572		42.2454		2.45043		14.8046		43.7671
	33	soil	NY20086-191	7.2		169.824		186		43.5952		2.52872		15.5137		38.1008
	34	soil	NY20086-192	7.1		162.101		166		42.7623		2.48041		15.2675		39.0565
	35	soil	NY20086-193	6.7	6.9	161.274	164.639	136.707	162.8	41.9794	42.106	2.435	2.44235	15.169	15.2439	26.6316	36.8912
RT-PA3	36	soil	NY20086-194	7		172.444		180		46.984		2.72529		16.6465		40.5
	37	soil	NY20086-195	6.9		176.374		137.904		45.8871		2.66167		16.6268		34.2777
	38	soil	NY20086-196	7.7		143.761		134.385		37.2483		2.16058		13.6718		25.4711
	39	soil	NY20086-197	7.6		144		146.007		37.3632		2.16724		13.4058		31.8883
	40	soil	NY20086-198	7	7.24	181.683	163.652	162	152.059	45.8927	42.6751	2.66199	2.47535	16.1639	15.303	44.8594	35.3993

## Sheet:  soil available Cd
		HOAc-extractable Cd (mg/kg)
	original valves	final values		original valves	final values
R-PA0	0.016	0.32	RT-PA0	0.016	0.32
	0.017	0.34		0.017
	0.012	0.24			0.34
	0.016	0.32		0.016	0.32
	0.015	0.3		0.02	0.4
	0.015	0.3		0.015	0.3
R-PA1	0.011	0.22	RT-PA1	0.018	0.36
	0.012	0.24		0.014	0.28
	0.012	0.24		0.017	0.34
	0.012	0.24		0.015	0.3
	0.011	0.22		0.016	0.32
	0.014	0.28		0.016	0.32
R-PA2	0.012	0.24	RT-PA2		0.22
	0.008	0.16		0.018	0.36
	0.009	0.18		0.013
	0.011	0.22		0.009	0.18
	0.009	0.18		0.016	0.32
	0.007	0.14		0.015	0.3
R-PA3	0.013	0.26	RT-PA3		0.3
	0.016	0.32		0.015	0.3
	0.011	0.22		0.017	0.34
	0.014	0.28		0.017	0.34
	0.014	0.28		0.015	0.3
	0.013	0.26		0.016	0.32

## Sheet: human health risk
	Cd content	Adult-male	Adult-female	children
	0.82	5.0892	5.79209	6.355
	0.88071	5.46599	6.22091	6.8255
R-PA0	0.939907	5.83339	6.63905	7.28428
	0.796826	4.94538	5.6284	6.1754
	0.964198	5.98415	6.81063	7.47254
	1.07631	6.67994	7.60253	8.34139
	0.759739	4.7152	5.36643	5.88798
	0.835767	5.18706	5.90345	6.47719
	0.653218	4.0541	4.61402	5.06244
R-PA1	0.848657	5.26706	5.99451	6.57709
	0.529957	3.2891	3.74336	4.10717
	0.706907	4.38731	4.99325	5.47853
	0.703505	4.3662	4.96922	5.45216
	0.748194	4.64355	5.28488	5.7985
	0.65	4.03413	4.59129	5.0375
R-PA2	0.490183	3.04225	3.46242	3.79892
	0.610887	3.79138	4.31501	4.73437
	0.570744	3.54224	4.03146	4.42327
	0.563085	3.4947	3.97736	4.36391
	0.659061	4.09036	4.65529	5.10773
	0.603815	3.74749	4.26506	4.67957
R-PA3	0.602165	3.73725	4.25341	4.66678
	0.684396	4.2476	4.83424	5.30407
	0.735175	4.56275	5.19293	5.69761
	0.0710595	0.0283286	0.0322412	0.034697
	0.075	0.0298995	0.034029	0.0366211
RT-PA0	0.072072	0.0287323	0.0327005	0.0351914
	0.082	0.0326902	0.0372051	0.0400391
	0.0726165	0.0289493	0.0329476	0.0354573
	0.084555	0.0337087	0.0383643	0.0412866
	0.0549315	0.021899	0.0249235	0.026822
	0.0475425	0.0189533	0.021571	0.0232141
	0.0490725	0.0195633	0.0222652	0.0239612
RT-PA1	0.0534105	0.0212927	0.0242334	0.0260793
	0.0686205	0.0273563	0.0311345	0.0335061
	0.055	0.0219263	0.0249546	0.0268555
	0.061702	0.0245982	0.0279955	0.0301279
	0.06	0.0239196	0.0272232	0.0292969
RT-PA2	0.0673155	0.026836	0.0305424	0.0328689
	0.060005	0.0239216	0.0272255	0.0292993
	0.0685025	0.0273092	0.031081	0.0334485
	0.060768	0.0242258	0.0275717	0.0296719
	0.0608525	0.0242595	0.02761	0.0297131
	0.062865	0.0250618	0.0285231	0.0306958
RT-PA3	0.065	0.0259129	0.0294918	0.0317383
	0.0609785	0.0243097	0.0276672	0.0297747
	0.05569	0.0222014	0.0252677	0.0271924
	0.059677	0.0237909	0.0270767	0.0291392

## Sheet: enzyme activities
No	Treatments		acid phosphatase(mg/g·h)	dehydrogenase（mg/g·24h）	urease（μg/g·24h）	catalyticase（μg/g·24h）	invertase (mg/g·24h)	β-galactosidase
1			8.79091	0.368	125.163	23.7506	76.4934	102.133
2			8.19671	0.366218	121.462	29.5083	117.384
3	R-PA0		7.61288	0.451639	154.771	29.2204	112.505	104.991
4			6.99256	0.377073	128.528	28.7886	117.616	149.28
5			6.89352	0.476494	177.65	30.228	108.788	92.1332
6			4.356	0.358431	449.857	28.7886	121.566	175.602
7			4.67548	0.123757	368.902	31.9553	116.222	204.794
8	R-PA2		4.4383	0.283866	346.397	28.7886	114.364	188.87
9			4.51038	0.100973	457.522	32.3871	116.455	246.426
10			3.79884	0.190193	546.682	37.4251	109.02	236.43
11			7.41218	0.740581	151.407	30.3719	115.525	181.937
12			7.74059	0.571772	115.406	27.3491	102.282	181.112
13	R-PA1		6.79187	0.471316	136.266	25.9097	117.616
14			8.25144	0.314935	239.558	32.3871	113.434	208.267
15			7.32096	0.463031	129.201	28.0689	122.031	157.234
16			5.38702	0.176919	354.098	31.8114	111.111	242.347
17			7.21697	0.354289	285.389	33.1069	110.879	225.409
18	R-PA3		8.12373	0.473387	261.5	29.7962	123.192	208.259
19			7.13851	0.142743	366.029	31.5235	112.505	197.644
20			7.29255	0.265293	433.129	30.3719	120.404	147.238
1			8.66675	0.561031	220.267	40.2004	130.658
3			7.19551	0.358874	232.524	40.4917	131.355	62.7106
4	RT-PA0		7.61589	0.622161	195.414	43.6961	149.71	96
5			9.32356	0.417812	239.333	40.783		102.934
6			9.96945	0.475449	237.29	43.6961	144.366	80.0803
7			8.14498	0.793291	985.636	45.8809		136.808
8			7.08679	0.861442	989.722	46.6092		154
9	RT-PA2			0.669319		48.2481	123.689	168
10			10.9766		853.54	50.9788	123.921	160.687
11			7.28748	0.936545	620.67	48.2463	134.84
12			8.12674	0.629148	702.379		116.719	199.26
13			6.81312	0.547743	203.279	44.4244	147.386	256
14			8.5387	0.64312	245.12	46.4286	137.164	261.712
15	RT-PA1		7.28748	0.501648	223.672	39.4488	148.316	327.026
16			8.26	0.56	253	47.31	146.82	287
17			8.14498	0.671065	254.313	56.4408	143.437	343.344
18			10.9218	0.646613	683.314	56.2223	130.649
19			8.11941	0.73086	498.107	56.2223	122.062	327.432
20	RT-PA3		9.59454	0.682881	646.545	56.2223	106.496	302.528
21			11.0276		444.222	56.2223	117.88	281.917
22			8.92405	0.888942	759.575	55.931	123.224
23				0.683291	513.087	55.931	100.92	265.386

## Sheet: Cd content in crops
Treatments	No	type	Num	Cd content mg/kg
R-PA0	1	稻米	NY20086-001	0.82
	2	稻米	NY20086-002	0.88071
	3	稻米	NY20086-003	0.939907
	4	稻米	NY20086-004	0.796826
	5	稻米	NY20086-005	0.964198
	6	稻米	NY20086-006	1.07631
R-PA1	7	稻米	NY20086-010	0.706907
	8	稻米	NY20086-011	0.759739
	9	稻米	NY20086-012	0.529957
	10	稻米	NY20086-013	0.835767
	11	稻米	NY20086-014	0.653218
	12	稻米	NY20086-015	0.848657
R-PA2	13	稻米	NY20086-020	0.703505
	14	稻米	NY20086-021	0.748194
	15	稻米	NY20086-022	0.65
	16	稻米	NY20086-023	0.490183
	17	稻米	NY20086-024	0.610887
	18	稻米	NY20086-025	0.570744
R-PA3	19	稻米	NY20086-028	0.563085
	20	稻米	NY20086-030	0.659061
	21	稻米	NY20086-031	0.603815
	22	稻米	NY20086-032	0.602165
	23	稻米	NY20086-033	0.684396
	24	稻米	NY20086-036	0.735175
RT-PA0	25	油菜	NY20086-087	0.0710595
	26	油菜	NY20086-088	0.075
	27	油菜	NY20086-089	0.072072
	28	油菜	NY20086-090	0.082
	29	油菜	NY20086-091	0.0726165
	30	油菜	NY20086-092	0.084555
RT-PA1	31	油菜	NY20086-093	0.0549315
	32	油菜	NY20086-094	0.0475425
	33	油菜	NY20086-095	0.0490725
	34	油菜	NY20086-096	0.0534105
	35	油菜	NY20086-097	0.0686205
	36	油菜	NY20086-098	0.055
RT-PA2	37	油菜	NY20086-099	0.061702
	38	油菜	NY20086-100	0.06
	39	油菜	NY20086-101	0.0673155
	40	油菜	NY20086-102	0.060005
	41	油菜	NY20086-103	0.0685025
	42	油菜	NY20086-104	0.060768
RT-PA3	43	油菜	NY20086-105	0.0608525
	44	油菜	NY20086-106	0.062865
	45	油菜	NY20086-107	0.065
	46	油菜	NY20086-108	0.0609785
	47	油菜	NY20086-109	0.05569
	48	油菜	NY20086-110	0.059677
