# Supplementary material for: The cooperative application of oyster shell and biochar efficiently enhanced in-situ remediation of cadmium contaminated soil around intensive industry
Source: Copernicus journal article supplement (doi:10.5194/soil-2021-145), 2022-01-24
Supplement: Supplementary file 1 [file soil-2021-145-supplement.zip]

**The cooperative application of oyster shell and biochar efficiently enhanced  
in-situ remediation of cadmium contaminated soil around intensive industry**

Bin Wu<sup>a\*</sup>, Jia Li, MingPing Sheng<sup>b</sup>, He Peng<sup>b</sup>, Dinghua Peng<sup>b</sup>, Heng Xu<sup>b\*1</sup>

<sup>a</sup> State Environmental Protection Key Laboratory of Synergetic Control and Joint Remediation for  
Soil & Water Pollution, College of Ecology and Environment, Chengdu University of Technology,  
1# Dongsanlu, Erxianqiao, Chengdu 610059, Sichuan, PR China

<sup>b</sup> Key Laboratory of Bio-Resource and Eco-Environment of Ministry of Education, College of  
Life Sciences, Sichuan University, Chengdu, 610065, PR China

---

<sup>1</sup> Corresponding author: E-mail address: [wub@cdut.edu.cn](mailto:wub@cdut.edu.cn) (Bin Wu); [xuheng64@sina.com](mailto:xuheng64@sina.com) (Heng Xu)

**Table S1** The main characteristics of soil and passivators.

| Properties                                 | Soil         |              | Biochar        | Oyster shell |
|--------------------------------------------|--------------|--------------|----------------|--------------|
|                                            | 2019         | 2020         |                |              |
| pH                                         | 5.54 ± 0.23  | 5.27 ± 0.18  | 8.22 ± 0.06    | 8.52 ± 0.32  |
| Cation exchange capacity<br>(CEC, cmol/kg) | 14.92 ± 0.62 | 15.21 ± 0.54 | 3.53 ± 0.11    | 1.32 ± 0.08  |
| OM (g/kg)                                  | 39.32 ± 2.34 | 43.47 ± 2.12 | 541.53 ± 11.73 | 12.60 ± 1.21 |
| Total N (g/kg)                             | 2.28 ± 0.39  | 2.31 ± 0.24  | 0.48 ± 0.06    | 1.42 ± 0.10  |
| Total P (g/kg)                             | 0.69 ± 0.07  | 0.65 ± 0.04  | 2.28 ± 0.32    | 0.60 ± 0.03  |
| Total K (g/kg)                             | 17.70 ± 1.35 | 17.81 ± 2.11 | 26.40 ± 0.92   | 2.00 ± 0.32  |
| C (%)                                      | 1.56 ± 0.21  | 1.53 ± 0.34  | 92.50 ± 4.52   | 15.72 ± 1.06 |
| Total Cd (mg/kg)                           | 1.60 ± 0.10  | 1.62 ± 0.07  | 0.05 ± 0.01    | 0.12 ± 0.03  |

**Table S2** The effect of passivators on soil nutrients.

| Treatments | TOC<br>(%)   | OM<br>(g/kg)  | Olsen-P<br>(mg/kg) | Olsen-K<br>(mg/kg) | Alkeline-N<br>(mg/kg) |
|------------|--------------|---------------|--------------------|--------------------|-----------------------|
| R-PA0      | 2.28 ± 0.17a | 39.32 ± 3.04a | 12.44 ± 0.96a      | 135.65 ± 13.65a    | 158.00 ± 7.28a        |
| R-PA1      | 2.39 ± 0.09a | 41.30 ± 1.55a | 11.62 ± 1.38a      | 165.40 ± 18.77b    | 165.20 ± 6.53a        |
| R-PA2      | 2.30 ± 0.06a | 40.36 ± 2.35a | 37.44 ± 9.50b      | 166.40 ± 18.55b    | 167.00 ± 7.17a        |
| R-PA3      | 2.51 ± 0.30a | 43.22 ± 3.47a | 35.76 ± 6.45b      | 176.00 ± 9.05b     | 167.00 ± 17.24a       |
| RT-PA0     | 2.35 ± 0.08a | 40.44 ± 0.82a | 9.32 ± 0.39a       | 154.00 ± 13.80a    | 156.20 ± 8.93a        |
| RT-PA1     | 2.61 ± 0.16a | 45.02 ± 2.74a | 9.10 ± 0.82a       | 166.60 ± 30.05a    | 163.60 ± 15.77a       |
| RT-PA2     | 2.44 ± 0.07a | 42.10 ± 1.38a | 36.90 ± 6.32b      | 163.30 ± 19.70a    | 164.60 ± 4.10a        |
| RT-PA3     | 2.47 ± 0.28a | 42.68 ± 4.93a | 35.42 ± 7.54b      | 156.00 ± 18.97a    | 163.60 ± 18.24a       |

## Market price of amendments

### (1) Biochar price

A: 4000 RMB/t

<https://detail.1688.com/offer/606079279556.html?spm=a26352.13672862.offerlist.6.50ef7c66Do04c1>

B: 3600 RMB/t

[https://s.1688.com/selloffer/similar\\_search.html?spm=a26352.13672862.offerlist.222.50ef7c66Do04c1&offerIds=611149343926&imageAddress=https%3A%2F%2Fcbu01.alicdn.com%2Fimg%2Fibank%2F2018%2F685%2F314%2F9229413586\\_1370517944.jpg&scene=similar\\_search&postCatPaths=1034839%2010373%208&sameDesign](https://s.1688.com/selloffer/similar_search.html?spm=a26352.13672862.offerlist.222.50ef7c66Do04c1&offerIds=611149343926&imageAddress=https%3A%2F%2Fcbu01.alicdn.com%2Fimg%2Fibank%2F2018%2F685%2F314%2F9229413586_1370517944.jpg&scene=similar_search&postCatPaths=1034839%2010373%208&sameDesign)

Enable=false

C: 1200 RMB/t

<https://detail.1688.com/offer/642635366559.html?spm=a26352.13672862.offerlist.14.50ef7c66Do04c1&tracelog=p4p&clickid=15069b95b2fd456980b4b8ef112b4a89&sessionid=644c22d484681bf74c6513e9617bd9fc>

**(2) Oyster shell powder**

A: 500 RMB/t

<https://detail.1688.com/offer/531648790633.html?spm=a26352.13672862.offerlist.38.35e42e726axM8V&tracelog=p4p&clickid=56cb1a130b3048569171c5e566418f30&sessionid=8dc02f341b05df19ff916d7d13e90c7d>

B: 490 RMB/t

<https://detail.1688.com/offer/630952510546.html?spm=a26352.13672862.offerlist.81.18562e72lpCSYZ>
